# Supplementary material
Source: publisher figshare collection journal article supplement (https://sage.figshare.com/ndownloader/files/22256844)
Supplement: Supplementary file 1 [file 22256844]

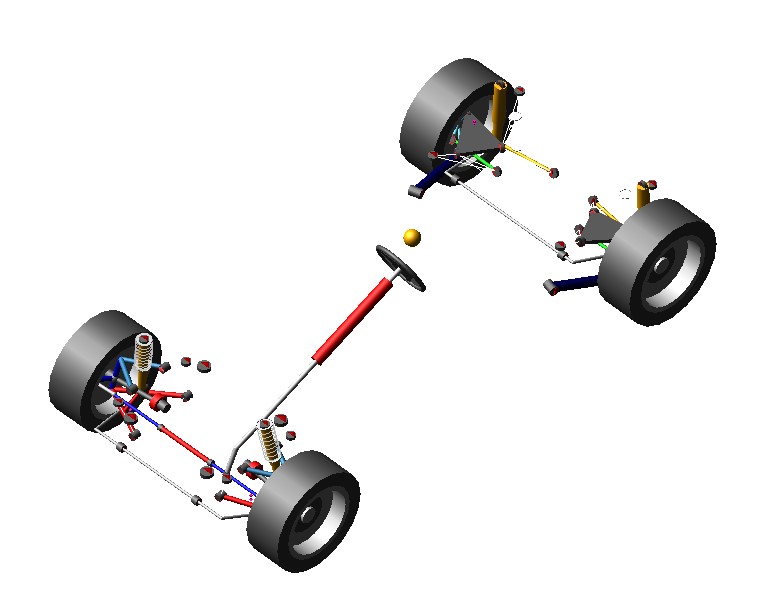


Figure1. Entire vehicle model


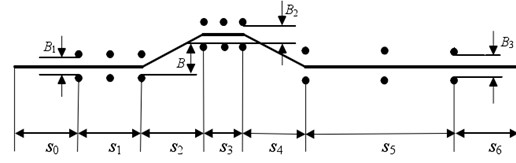


Figure2. The double lane test site


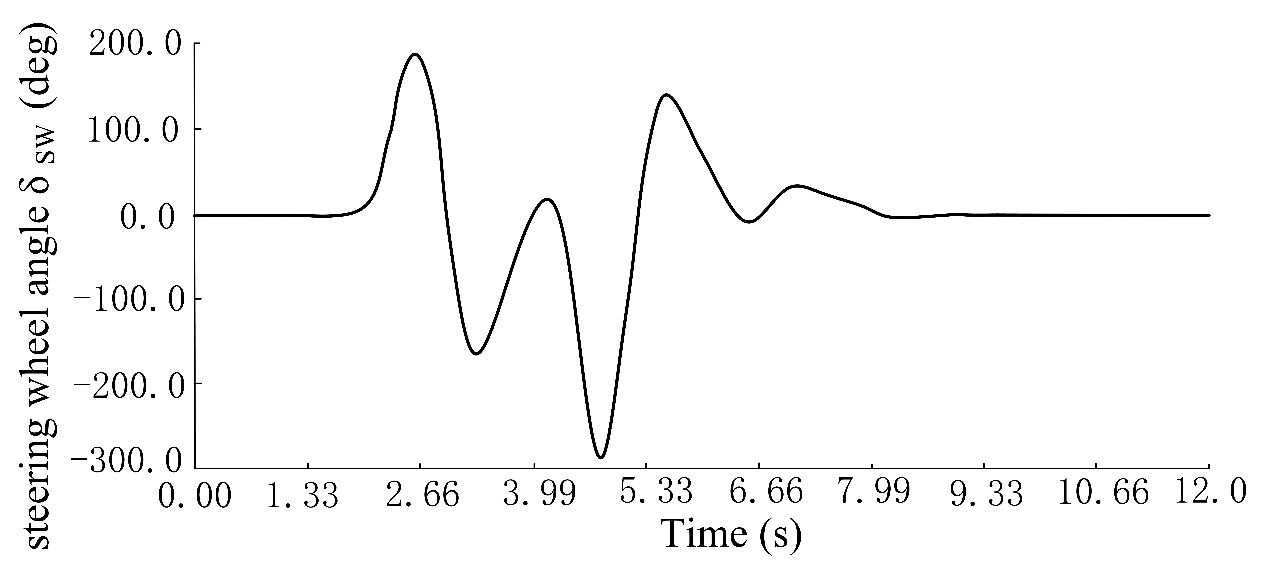


Figure3. Steering wheel angle


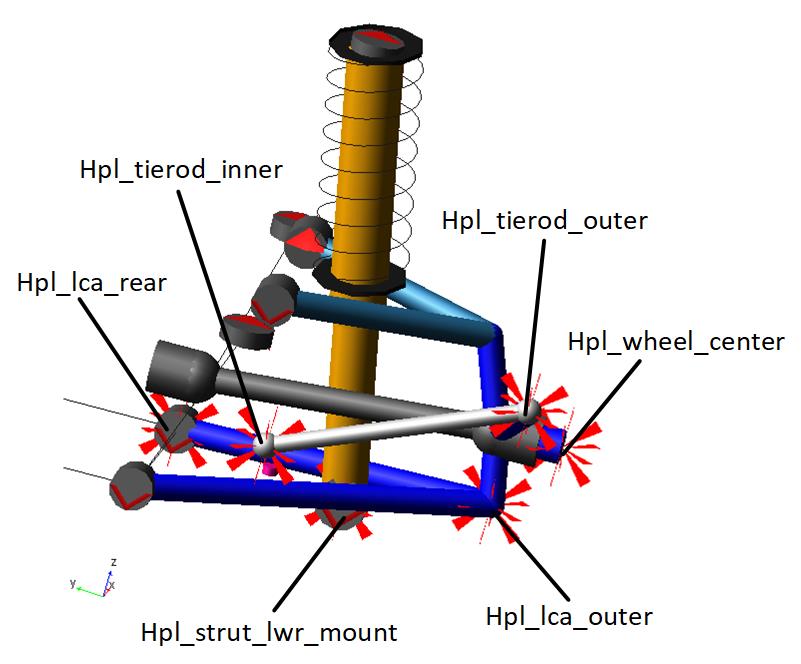


Figure4. The hard points before optimization


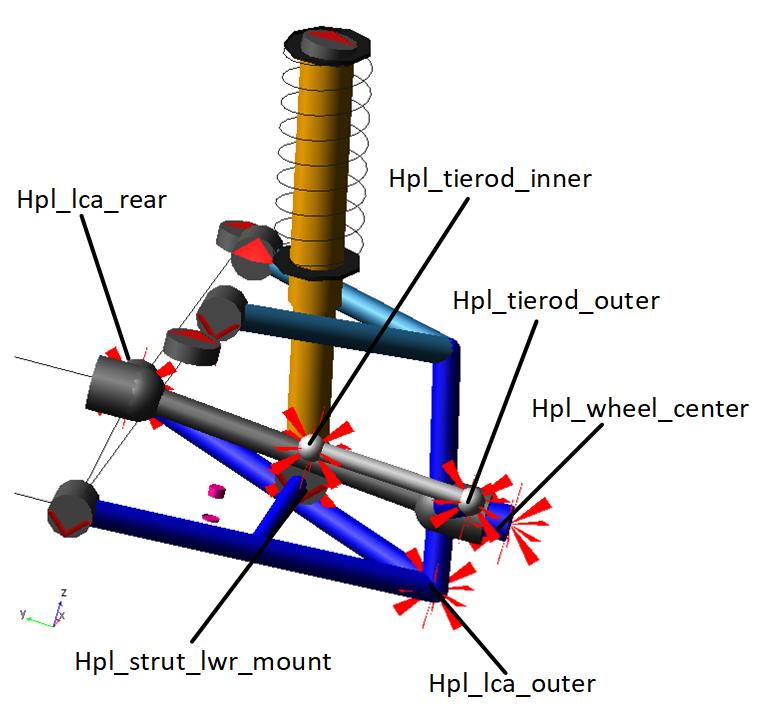


Figure5. The hard points after optimization


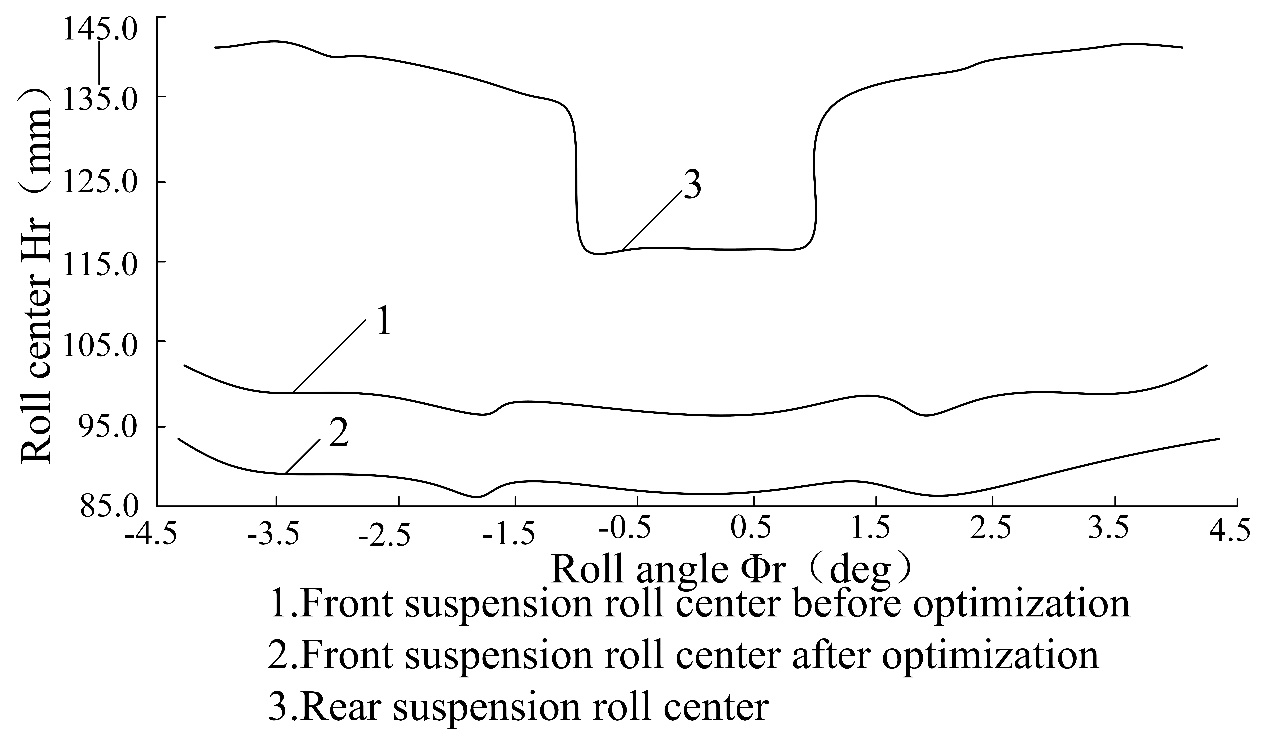


Figure6. Comparison of roll center before and after optimization


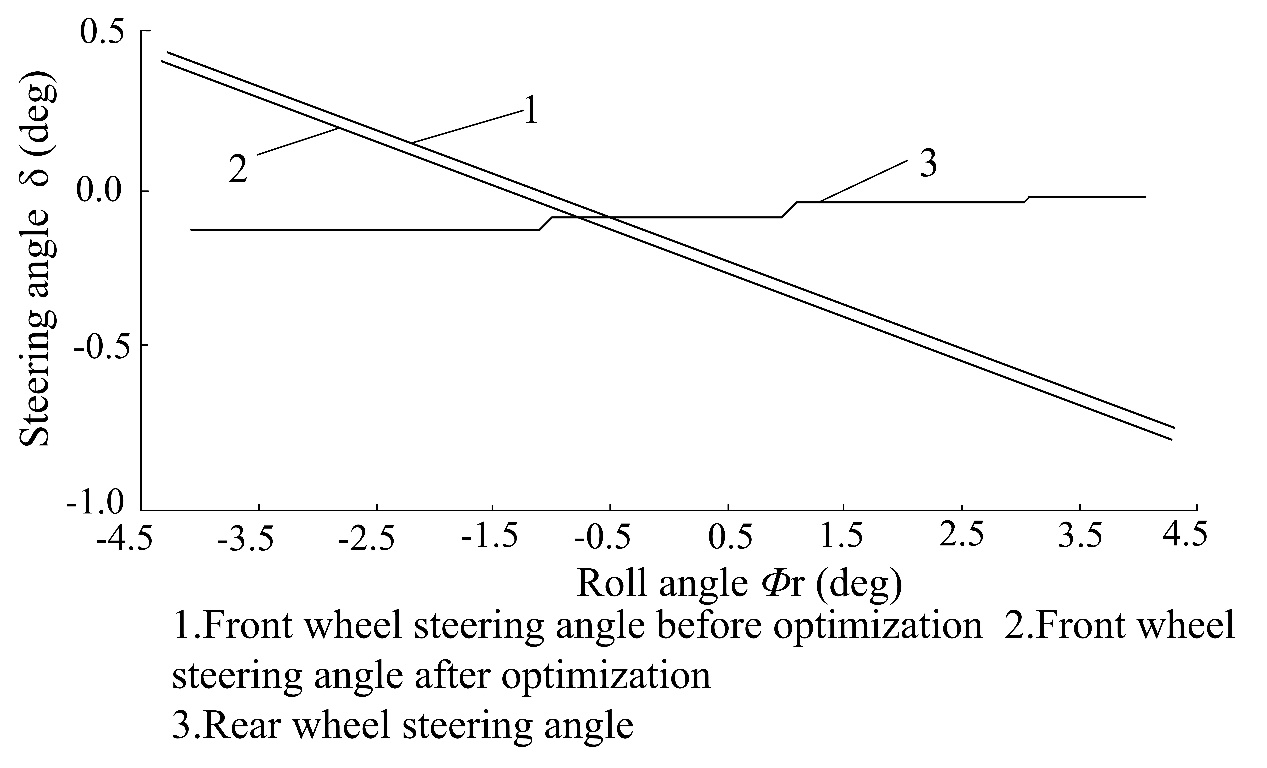


Figure7. Comparison of steering angle with roll angle before and after optimization


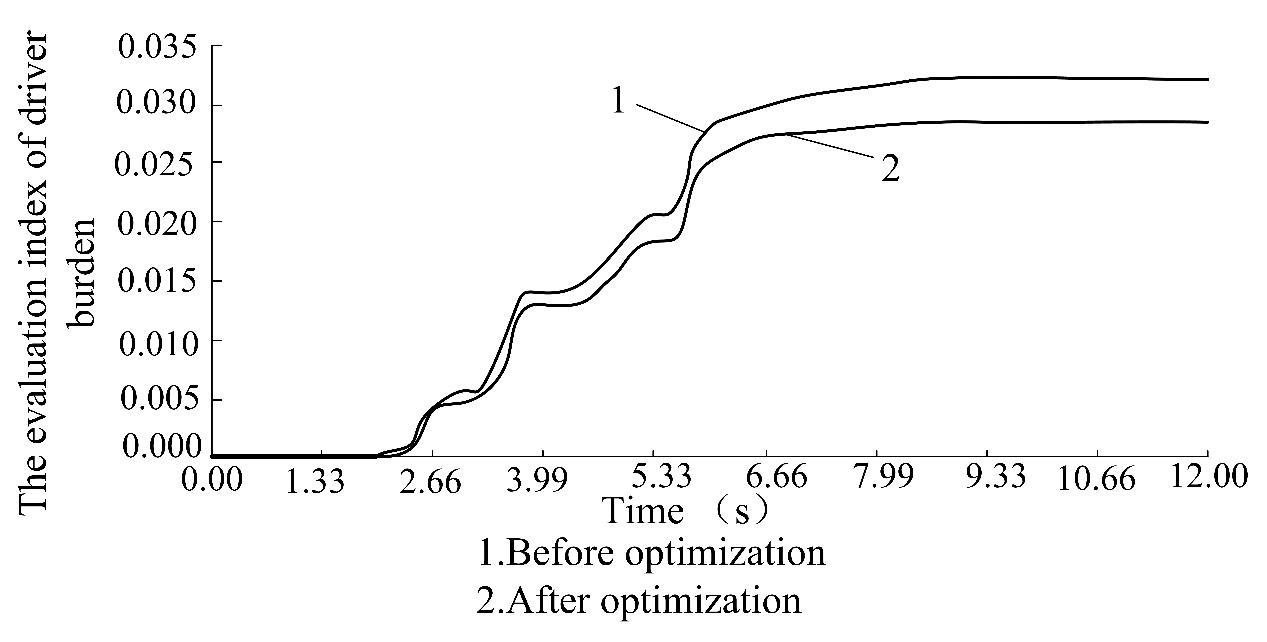


Figure8. Comparison of the evaluation index of driver burden before and after optimization


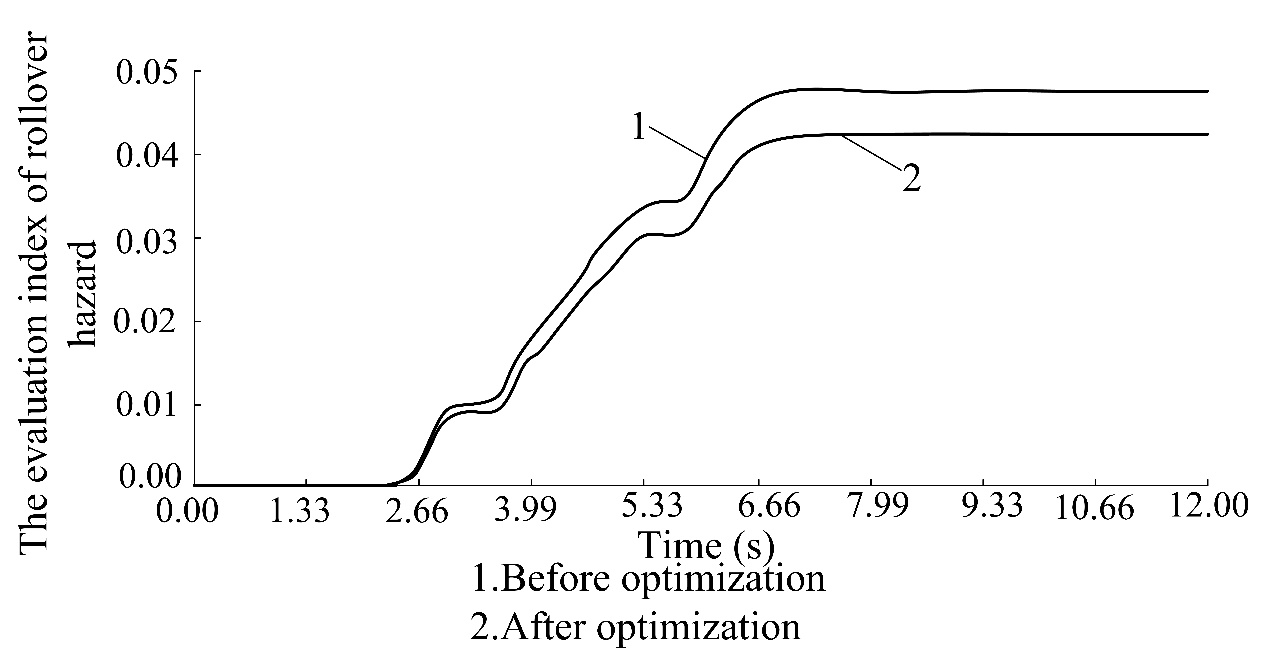


Figure9. Comparison of the evaluation index of rollover hazard before and after optimization


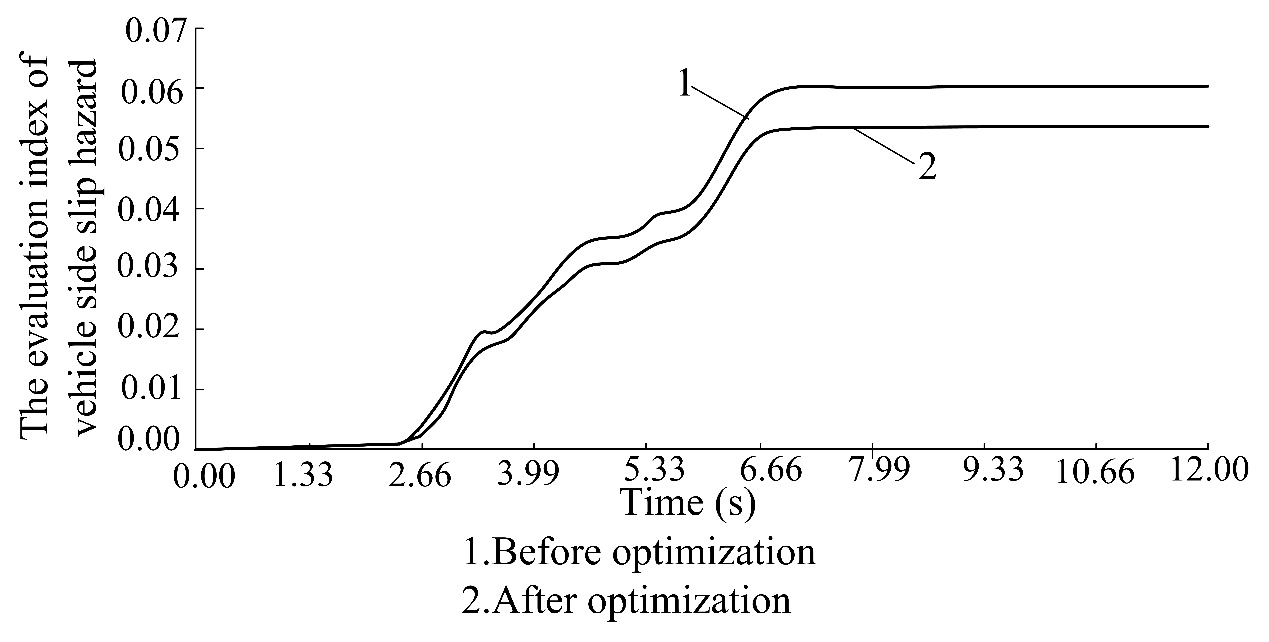


Figure10. Comparison of the evaluation index of vehicle side slip hazard before and after optimization


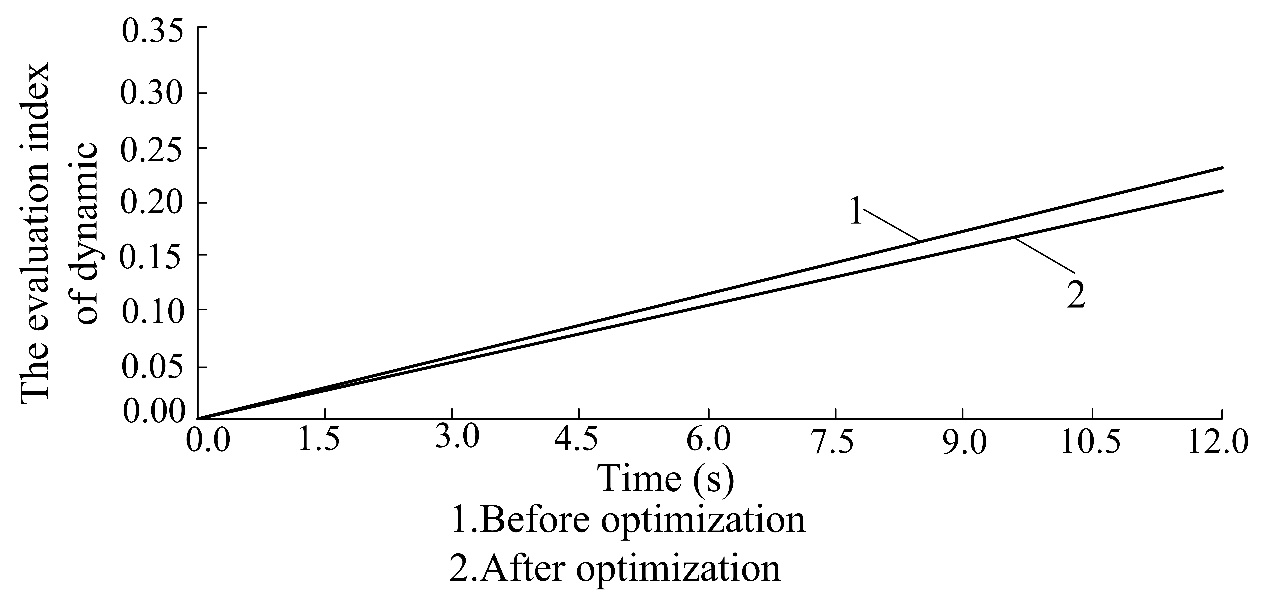


Figure11. Comparison of the evaluation index of dynamic before and after optimization


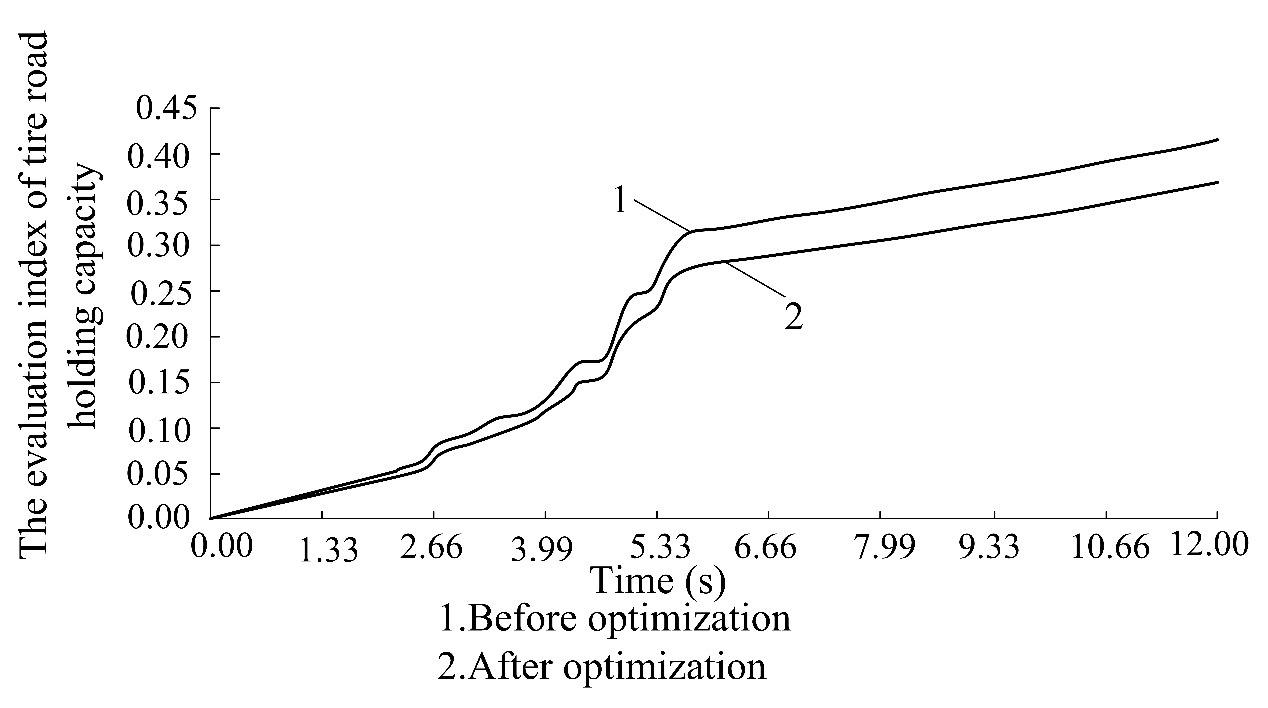


Figure12. Comparison of the evaluation index of tire road holding capacity before and after optimization


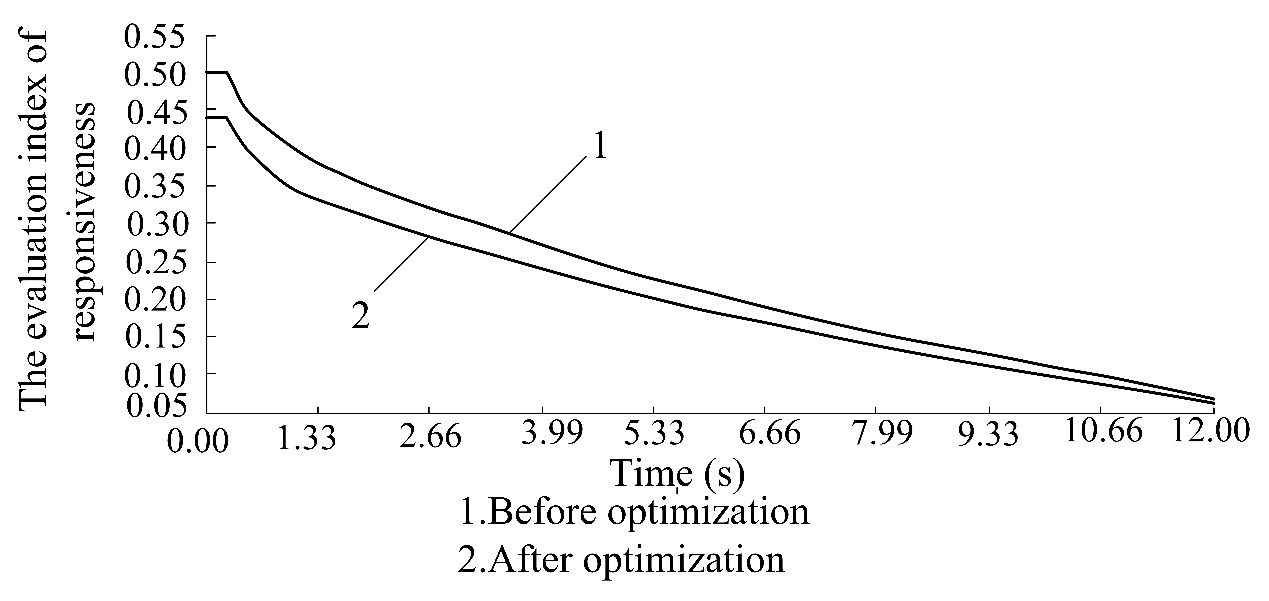


Figure13. Comparison of the evaluation index of responsiveness before and after optimization


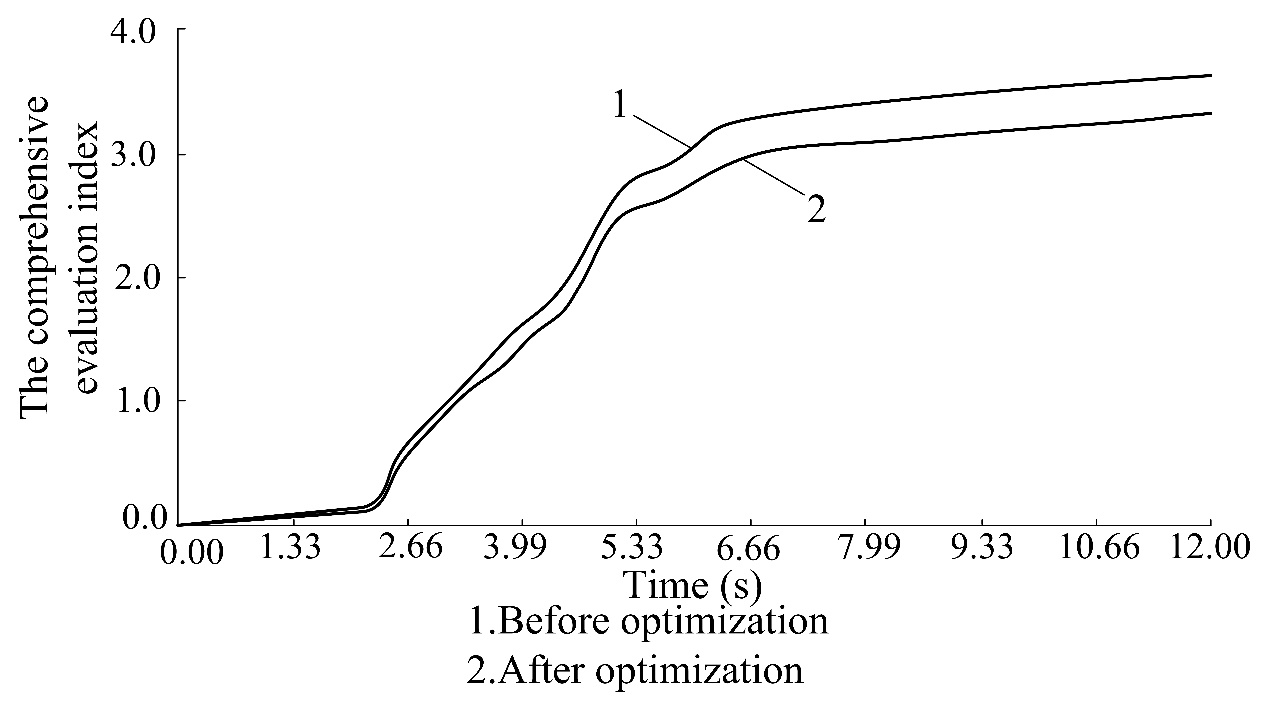


Figure14. Comparison of the comprehensive evaluation index before and after optimization
